# Supplementary material for: DNA Barcoding Data Reveal Important Overlooked Diversity of Cortinarius sensu lato (Agaricales, Basidiomycota) in the Romanian Carpathians
Source: MDPI journal article supplement (doi:10.3390/d15040553), 2023-04-13
Supplement: s1 [file s1]

**Table S1.** *Cortinarius* sequences from public databases used in this study.

| Species name                                 | Country        | GenBank Acc. No. |
|----------------------------------------------|----------------|------------------|
| <i>C. albertii</i>                           | Hungary        | DQ323958         |
| <i>C. alboviolaceus</i>                      | Sweden         | MT934857         |
| <i>C. alcalinophilus</i>                     | United Kingdom | MK010932         |
| <i>C. anfractoides</i>                       | France         | NR132060         |
| <i>C. anomalus</i>                           | Denmark        | AJ889940         |
| <i>C. anomalus</i>                           | Switzerland    | KX302231         |
| <i>C. aureopulverulentus</i>                 | Austria        | AF503541         |
| <i>C. aureopulverulentus</i>                 | Sweden         | DQ663231         |
| <i>C. balteatocumatilis</i>                  | Germany        | KJ421190         |
| <i>C. balteatocumatilis</i>                  | Russia         | MK402161         |
| <i>C. balteatus</i>                          | Sweden         | NR130194         |
| <i>C. bergeronii</i>                         | Czech Republic | LT629335         |
| <i>C. brunneus</i>                           | Sweden         | DQ117927         |
| <i>C. bulliardii</i>                         | Sweden         | JX114942         |
| <i>C. caesiophylloides</i>                   | Finland        | NR130303         |
| <i>C. calochrous</i>                         | Denmark        | DQ323960         |
| <i>C. camphoratus</i>                        | Spain          | MT775573         |
| <i>C. caninus</i>                            | Russia         | MN308205         |
| <i>C. caninus</i>                            | Switzerland    | KX302252         |
| <i>C. caperatus</i>                          | Germany        | KJ421160         |
| <i>C. caperatus</i>                          | Canada         | FJ157020         |
| <i>C. catharinae</i>                         | Spain          | EU057065         |
| <i>C. catharinae</i>                         | Italy          | KY490534         |
| <i>C. cinereobrunneolus</i>                  | France         | MT934961         |
| <i>C. cinnamomeus</i>                        | Sweden         | NR131816         |
| <i>C. claricolor</i>                         | Sweden         | NR130209         |
| <i>C. collinitus</i>                         | Austria        | AF325573         |
| <i>C. collinitus</i>                         | Germany        | AY669588         |
| <i>C. collocandoides</i>                     | France         | NR130210         |
| <i>C. colymbadinus</i>                       | Sweden         | NR131819         |
| <i>C. corrosus</i>                           | Spain          | EU057057         |
| <i>C. corrosus</i>                           | Germany        | KJ421199         |
| <i>C. croceus</i>                            | Finland        | NR131863         |
| <i>C. cumatilis</i>                          | Germany        | AY174812         |
| <i>C. daulnoyae</i>                          | France         | KX228458         |
| <i>C. daulnoyae</i>                          | France         | NR158402         |
| <i>C. decolorans</i>                         | Germany        | AY174792         |
| <i>C. delibutus</i> 2 ' <i>citrinellus</i> ' | USA            | U56025           |
| <i>C. dionysae</i>                           | Germany        | KJ421135         |
| <i>C. duracinus</i>                          | Sweden         | MT935027         |
| <i>C. elatior</i> s.l.                       | Denmark        | AM113951         |
| <i>C. elegantior</i>                         | Spain          | JX219779         |
| <i>C. elegantior</i>                         | Switzerland    | GU363464         |
| <i>C. elegantissimus</i>                     | Germany        | EU057037         |
| <i>C. elegantissimus</i>                     | Norway         | AY669565         |

|                              |             |            |
|------------------------------|-------------|------------|
| <i>C. eliae</i>              | France      | NR130216   |
| <i>C. epipurrus</i>          | France      | MT935029   |
| <i>C. exsularis</i>          | Spain       | KX234735   |
| <i>C. fraudulosus</i>        | Germany     | NR130292   |
| <i>C. fulminoides</i>        | Germany     | KJ421200   |
| <i>C. fulminoides</i>        | Italy       | MK965087   |
| <i>C. gallurae</i>           | Spain       | KU953934   |
| <i>C. geniculatus</i>        | France      | MH784786   |
| <i>C. gentilis</i>           | Norway      | EU266692   |
| <i>C. glaucopus</i>          | Sweden      | NR130222   |
| <i>C. aff. glaucopus</i>     | Germany     | KJ421207   |
| <i>C. haasii</i>             | France      | KY290697   |
| <i>C. hadrocroceus</i>       | Canada      | NR131854   |
| <i>C. hallingii</i>          | USA         | KJ421159   |
| <i>C. herculeus</i>          |             | KJ421098   |
| <i>C. hillieri</i>           | France      | NR171338   |
| <i>C. hinnuleus</i>          | Sweden      | DQ117926   |
| <i>C. holoxanthus</i>        | Italy       | MT002309   |
| <i>C. holoxanthus</i>        | Italy       | MT002310   |
| <i>C. huronensis</i>         | Canada      | MN751292   |
| <i>C. huronensis</i>         | Canada      | MN992343   |
| <i>C. hydrotelamonoides</i>  | France      | MT935145   |
| <i>C. incognitus</i>         | Canada      | MN 751325  |
| <i>C. infractus</i>          | Sweden      | NR130225   |
| <i>C. kompsos</i>            | France      | MW367679   |
| <i>C. lacustris</i>          | France      | NR171344   |
| <i>C. largus</i>             | Finland     | NR130180   |
| <i>C. leproleptopus</i>      | France      | MW009226   |
| <i>C. lilacinovelatus</i>    | Spain       | EU057055   |
| <i>C. luridus</i>            | France      | MT935201   |
| <i>C. luridus</i>            | Sweden      | MT935202   |
| <i>C. magicus</i>            | Denmark     | DQ083794   |
| <i>C. aff. magicus</i>       | Germany     | KJ421187   |
| <i>C. masseei</i>            | Estonia     | UDB0383516 |
| <i>C. mitwok</i>             | USA         | NR157883   |
| <i>C. multiformis</i>        | Sweden      | NR130232   |
| <i>C. napus</i>              | Germany     | EU057067   |
| <i>C. napus</i>              | Pacific USA | GU363493   |
| <i>C. neofurvolaeus</i>      | Sweden      | NR131789   |
| <i>C. norrlandicus</i>       | Sweden      | NR130181   |
| <i>C. obtusus</i>            | Norway      | KC842421   |
| <i>C. ochraceopallescens</i> | Germany     | EU057077   |
| <i>C. ochraceopallescens</i> | France      | DQ663354   |
| <i>C. odoratus</i>           | Denmark     | DQ663358   |
| <i>C. odoratus</i>           | Germany     | AY174836   |
| <i>C. olearioides</i>        | Sweden      | DQ083803   |
| <i>C. olidoamarus</i>        | Germany     | KJ421042   |
| <i>C. olidoamarus</i>        | Hungary     | MK358099   |

|                            |                |           |
|----------------------------|----------------|-----------|
| <i>C. olivaceodionysae</i> | Germany        | AY669523  |
| <i>C. ominosus</i>         | Hungary        | UDB021551 |
| <i>C. pallidostriatus</i>  | USA            | MT935271  |
| <i>C. paracephalixus</i>   | Netherlands    | AY669516  |
| <i>C. persoonianus</i>     | Germany        | KJ421118  |
| <i>C. persoonianus</i>     | France         | KF732382  |
| <i>C. piceae</i>           | Sweden         | DQ663378  |
| <i>C. pilatii</i>          | Czech Republic | MT935305  |
| <i>C. pluviorum</i>        | Canada         | HQ604684  |
| <i>C. praestans</i>        | Germany        | AY174802  |
| <i>C. pseudocisticola</i>  | Germany        | EU057075  |
| <i>C. pseudodaulnoyae</i>  | France         | KX228455  |
| <i>C. pseudodaulnoyae</i>  | France         | KX228456  |
| <i>C. pseudofervidus</i>   | Sweden         | NR131817  |
| <i>C. pseudonaevosus</i>   | France         | NR130249  |
| <i>C. purpurascens</i>     | Sweden         | NR130252  |
| <i>C. putorius</i>         | USA            | NR153038  |
| <i>C. radicosissimus</i>   | Spain          | MT935371  |
| <i>C. radicosissimus</i>   | Sweden         | MT935372  |
| <i>C. renidens</i>         | Germany        | AY669652  |
| <i>C. reverendissimus</i>  | Russia         | MT739806  |
| <i>C. rubellus</i>         | Germany        | JF907883  |
| <i>C. rubricosus</i>       | France         | NR171148  |
| <i>C. rubrophyllus</i>     | France         | NR153036  |
| <i>C. rufoallutus</i>      | France         | NR130258  |
| <i>C. saginus</i>          | Germany        | AY174800  |
| <i>C. saginus</i>          | Norway         | KC842448  |
| <i>C. salor</i>            | Estonia        | UDB034759 |
| <i>C. saporatus</i>        | Denmark        | DQ083811  |
| <i>C. saporatus</i>        | Germany        | AY669570  |
| <i>C. scaurocaninus</i>    | Germany        | KX520673  |
| <i>C. scaurocaninus</i>    | Spain          | MK816384  |
| <i>C. semiodoratus</i>     | Germany        | AY669665  |
| <i>C. semisanguineus</i>   | Sweden         | JN114090  |
| <i>C. semivelatus</i>      | France         | MT935428  |
| <i>C. sodagnitus</i>       | Italy          | EU057076  |
| <i>C. sodagnitus</i>       | France         | KY290696  |
| <i>C. sp.</i>              | Canada         | MN751619  |
| <i>C. spadicellus</i>      | Germany        | KJ421092  |
| <i>C. spadicellus</i>      | Norway         | AY669539  |
| <i>C. spilomeus</i>        | Sweden         | NR153075  |
| <i>C. squalidus</i>        | USA            | MT935450  |
| <i>C. subargyronotus</i>   | Sweden         | NR131871  |
| <i>C. subdecolorans</i>    | France         | NR130266  |
| <i>C. subfoetens</i>       | China          | MH295817  |
| <i>C. subfoetens</i>       | USA            | NR130267  |
| <i>C. sublilacinopes</i>   | Czech Republic | DQ323977  |
| <i>C. subparvannulatus</i> | France         | NR171158  |

|                            |                |          |
|----------------------------|----------------|----------|
| <i>C. subporphyropus</i>   | Hungary        | KT159228 |
| <i>C. subpurpurascens</i>  | Finland        | NR130270 |
| <i>C. subrubrovelatus</i>  | France         | NR153009 |
| <i>C. subrugulosus</i>     | Sweden         | KJ421054 |
| <i>C. subtortus</i>        | Sweden         | NR130273 |
| <i>C. sulphurinus</i>      | Austria        | EU056995 |
| <i>C. sulphurinus</i>      | Germany        | AY669572 |
| <i>C. talimultiformis</i>  | Sweden         | NR130306 |
| <i>C. testaceomicaceus</i> | France         | MH784817 |
| <i>C. tirolianus</i>       | France         | KF732460 |
| <i>C. tirolianus</i>       | France         | NR130277 |
| <i>C. torvus</i>           | Germany        | AY669668 |
| <i>C. traganus</i>         | Sweden         | MT935361 |
| <i>C. trivialis</i>        | Russia         | DQ295113 |
| <i>C. trivialis</i>        | Spain          | AJ296300 |
| <i>C. turgidus</i>         | Germany        | AY669689 |
| <i>C. turmalis</i>         | Sweden         | NR130278 |
| <i>C. ultrodistortus</i>   | United Kingdom | MK010941 |
| <i>C. uraceonemoralis</i>  | Italy          | NR131836 |
| <i>C. uraceus</i>          | Finland        | NR131837 |
| <i>C. urbicus</i>          | Sweden         | KP866158 |
| <i>C. variicolor</i>       | Sweden         | NR130279 |
| <i>C. varius</i>           | Sweden         | NR130281 |
| <i>C. venetus</i>          | Sweden         | MW010189 |
| <i>C. vibratilis</i>       | Finland        | MZ568649 |
| <i>C. aff. vibratilis</i>  | Canada         | MN992358 |
| <i>C. violaceus</i>        | Germany        | AY669579 |
| <i>C. xanthochlorus</i>    | Sweden         | EU057047 |
| <i>C. xanthoochraceus</i>  | Germany        | AY669558 |

**Table S2.** *Cortinarius* taxa published to date from Romania and identified with morphological methods.

| Taxa                                                                        | References | Confirmed by ITS Sequences in This Study |
|-----------------------------------------------------------------------------|------------|------------------------------------------|
| <i>Cortinarius acutus</i> (Pers.) Fr. 1838                                  | [79]       | no                                       |
| <i>Cortinarius alboviolaceus</i> (Pers.) Fr. 1838                           | [79]       | yes                                      |
| <i>Cortinarius allutus</i> Fr. 1838                                         | [79]       | no                                       |
| <i>Cortinarius alnetorum</i> (Velen.) M.M. Moser 1967                       | [79]       | no                                       |
| <i>Cortinarius amethystinus</i> Quél. 1886                                  | [117]      | no                                       |
| <i>Cortinarius angelesianus</i> A.H. Sm. 1944                               | [79]       | no                                       |
| <i>Cortinarius anomalus</i> (Fr.) Fr. 1838                                  | [79]       | yes                                      |
| <i>Cortinarius arcuatus</i> (Bull.) Quél. 1883                              | [117]      | no                                       |
| <i>Cortinarius argentatus</i> (Pers.) Fr. 1838                              | [118]      | no                                       |
| <i>Cortinarius armeniacus</i> (Schaeff.) Fr. 1838                           | [117]      | no                                       |
| <i>Cortinarius armillatus</i> (Fr.) Fr. 1838                                | [79]       | no                                       |
| <i>Cortinarius atrovirens</i> Kalchbr. 1874                                 | [119]      | no                                       |
| <i>Cortinarius anfractus</i> Fr. 1838                                       | [117]      | no                                       |
| <i>Cortinarius anserinus</i> (Velen.) Rob. Henry 1986                       | [79]       | no                                       |
| <i>Cortinarius balaustinus</i> Fr. 1838                                     | [119]      | no                                       |
| <i>Cortinarius balteatus</i> Fr. 1838                                       | [117]      | yes                                      |
| <i>Cortinarius bergeronii</i> (Melot) Melot 1992                            | [79]       | yes                                      |
| <i>Cortinarius betulinus</i> J. Favre 1948                                  | [119]      | no                                       |
| <i>Cortinarius bivelus</i> (Fr.) Fr. 1838                                   | [120]      | no                                       |
| <i>Cortinarius bovinus</i> Fr. 1838                                         | [117]      | no                                       |
| <i>Cortinarius bulliardii</i> (Pers.) Fr. 1838                              | [117]      | yes                                      |
| <i>Cortinarius caerulescens</i> (Schaeff.) Fr. 1838                         | [117]      | no                                       |
| <i>Cortinarius cagei</i> Melot 1990                                         | [79]       | no                                       |
| <i>Cortinarius callisteus</i> (Fr.) Fr. 1838                                | [121]      | no                                       |
| <i>Cortinarius calochrous</i> (Pers.) Gray 1821                             | [117]      | yes                                      |
| <i>Cortinarius camphoratus</i> (Fr.) Fr. 1838                               | [79]       | yes                                      |
| <i>Cortinarius caninus</i> (Fr.) Fr. 1838                                   | [79]       | yes                                      |
| <i>Cortinarius caperatus</i> (Pers.) Fr. 1838                               | [79]       | yes                                      |
| <i>Cortinarius chrysolithus</i> Kauffman 1915                               | [79]       | no                                       |
| <i>Cortinarius cinnabarinus</i> Fr. 1838                                    | [117]      | no                                       |
| <i>Cortinarius cinnamomeoluteus</i> P.D. Orton 1960                         | [122]      | no                                       |
| <i>Cortinarius cinnamomeus</i> (L.) Gray 1821                               | [117]      | yes                                      |
| <i>Cortinarius collinitus</i> (Sowerby) Gray 1821                           | [117]      | yes                                      |
| <i>Cortinarius collocandoides</i> Reumaux 2009                              | [79]       | yes                                      |
| <i>Cortinarius cotoneus</i> Fr. 1838                                        | [123]      | no                                       |
| <i>Cortinarius croceus</i> (Schaeff.) Gray 1821                             | [79,117]   | yes                                      |
| <i>Cortinarius cumatilis</i> Fr. 1838                                       | [79]       | no                                       |
| <i>Cortinarius cyanopus</i> Secr. ex Fr. 1838                               | [117]      | no                                       |
| <i>Cortinarius damascenus</i> Fr. 1838                                      | [124]      | no                                       |
| <i>Cortinarius decoloratus</i> (Fr.) Fr. 1838                               | [117]      | no                                       |
| <i>Cortinarius decumbens</i> (Pers.) Fr. 1838                               | [117]      | no                                       |
| <i>Cortinarius delibutus</i> Fr. 1838                                       | [79]       | yes                                      |
| <i>Cortinarius diasemospermus</i> var. <i>leptospermus</i> H. Lindstr. 1998 | [79]       | no                                       |
| <i>Cortinarius dibaphus</i> Fr. 1838                                        | [123]      | no                                       |
| <i>Cortinarius elatior</i> Fr. 1838                                         | [125]      | yes                                      |
| <i>Cortinarius elegantior</i> (Fr.) Fr. 1838                                | [119]      | yes                                      |
| <i>Cortinarius elegantissimus</i> Rob. Henry 1943                           | [79]       | yes                                      |

|                                                                             |          |     |
|-----------------------------------------------------------------------------|----------|-----|
| <i>Cortinarius erythrinus</i> (Fr.) Fr. 1838                                | [126]    | no  |
| <i>Cortinarius evernius</i> (Fr.) Fr. 1838                                  | [117]    | no  |
| <i>Cortinarius flexipes</i> (Pers.) Fr. 1838                                | [79]     | no  |
| <i>Cortinarius fulgens</i> Fr. 1838                                         | [117]    | no  |
| <i>Cortinarius fulvescens</i> Fr. 1838                                      | [79]     | no  |
| <i>Cortinarius fulvoincarnatus</i> Joachim 1936                             | [127]    | no  |
| <i>Cortinarius fulvo-ochraceus</i> Rob. Henry 1943                          | [53]     | no  |
| <i>Cortinarius gentilis</i> (Fr.) Fr. 1838                                  | [117]    | yes |
| <i>Cortinarius glaucopus</i> (Schaeff.) Gray 1821                           | [117]    | yes |
| <i>Cortinarius glaucopus</i> var. <i>olivaceus</i> (M.M. Moser) Quadr. 1985 | [79]     | no  |
| <i>Cortinarius hemitrichus</i> (Pers.) Fr. 1838                             | [127]    | no  |
| <i>Cortinarius hinnuleus</i> Fr. 1838                                       | [117]    | yes |
| <i>Cortinarius humicola</i> (Quél.) Maire 1911                              | [117]    | no  |
| <i>Cortinarius iliopodius</i> (Bull.) Fr. 1838                              | [122]    | no  |
| <i>Cortinarius illuminus</i> Fr. 1838                                       | [79]     | no  |
| <i>Cortinarius imbutus</i> Fr. 1838                                         | [121]    | no  |
| <i>Cortinarius infractus</i> (Pers.) Fr. 1838                               | [117]    | no  |
| <i>Cortinarius inochlorus</i> Maire 1937                                    | [128]    | no  |
| <i>Cortinarius inolens</i> (H. Lindstr.) Bidaud 2010                        | [79]     | no  |
| <i>Cortinarius kristinae</i> Brandrud 2017                                  | [79]     | no  |
| <i>Cortinarius largus</i> Fr. 1838                                          | [117]    | yes |
| <i>Cortinarius lebretonii</i> Quél. 1880                                    | [79]     | no  |
| <i>Cortinarius leucopus</i> (Bull.) Fr. 1838                                | [117]    | no  |
| <i>Cortinarius limonius</i> (Fr.) Fr. 1838                                  | [117]    | no  |
| <i>Cortinarius lucorum</i> (Fr.) E. Berger 1846                             | [125]    | no  |
| <i>Cortinarius lustrabilis</i> Moënné-Locc. 2000                            | [79]     | no  |
| <i>Cortinarius magicus</i> Eichhorn 1967                                    | [79]     | yes |
| <i>Cortinarius malicorius</i> Fr. 1838                                      | [79]     | no  |
| <i>Cortinarius mucosus</i> (Bull.) J. Kickx f. 1867                         | [79,117] | no  |
| <i>Cortinarius multififormis</i> Fr. 1838                                   | [117]    | yes |
| <i>Cortinarius napus</i> Fr. 1838                                           | [117]    | yes |
| <i>Cortinarius ochroleucus</i> (Schaeff.) Fr. 1838                          | [117]    | no  |
| <i>Cortinarius olearioides</i> Rob. Henry 1987                              | [81]     | yes |
| <i>Cortinarius orellanus</i> Fr. 1838                                       | [85]     | no  |
| <i>Cortinarius orichalceus</i> (Batsch) Fr. 1838                            | [117]    | no  |
| <i>Cortinarius paleaceus</i> Fr. 1838                                       | [127]    | no  |
| <i>Cortinarius percomis</i> Fr. 1838                                        | [123]    | no  |
| <i>Cortinarius pholideus</i> (Lilj.) Fr. 1838                               | [79]     | no  |
| <i>Cortinarius praestans</i> (Cordier) Gillet 1876                          | [117]    | no  |
| <i>Cortinarius prasinus</i> (Schaeff.) Fr. 1838                             | [117]    | no  |
| <i>Cortinarius punctatus</i> (Pers.) Fr. 1838                               | [117]    | no  |
| <i>Cortinarius purpurascens</i> Fr. 1838                                    | [117]    | yes |
| <i>Cortinarius purpureus</i> (Bull.) Bidaud, Moënné-Locc. & Reumaux 1994    | [79]     | no  |
| <i>Cortinarius quarcticus</i> H. Lindstr. 1994                              | [79]     | no  |
| <i>Cortinarius riederi</i> (Weinm.) Fr. 1838                                | [79]     | no  |
| <i>Cortinarius rigens</i> (Pers.) Fr. 1838                                  | [124]    | no  |
| <i>Cortinarius rubellus</i> Cooke 1887                                      | [129]    | yes |
| <i>Cortinarius rufo-olivaceus</i> (Pers.) Fr. 1838                          | [117]    | no  |
| <i>Cortinarius salor</i> Fr. 1838                                           | [117]    | yes |
| <i>Cortinarius sanguineus</i> (Wulfen) Gray 1821                            | [79]     | no  |

|                                                                                             |          |     |
|---------------------------------------------------------------------------------------------|----------|-----|
| <i>Cortinarius scaurus</i> (Fr.) Fr. 1838                                                   | [117]    | no  |
| <i>Cortinarius semisanguineus</i> (Fr.) Gillet 1876                                         | [79,117] | yes |
| <i>Cortinarius sphagnophilus</i> Peck 1878                                                  | [79]     | no  |
| <i>Cortinarius spilomeus</i> (Fr.) Fr. 1863                                                 | [79]     | yes |
| <i>Cortinarius stillatitius</i> Fr. 1838                                                    | [121]    | no  |
| <i>Cortinarius suberi</i> Soop 1990                                                         | [79]     | no  |
| <i>Cortinarius subfulgens</i> P.D. Orton 1960                                               | [87]     | no  |
| <i>Cortinarius subparvannulatus</i> Moënné-Locc. & Fillion 2010                             | [79]     | yes |
| <i>Cortinarius subtortus</i> (Pers.) Fr. 1838                                               | [79]     | yes |
| <i>Cortinarius sulfurinus</i> Qué. 1884                                                     | [79]     | yes |
| <i>Cortinarius tabularis</i> (Fr.) Fr. 1838                                                 | [125]    | no  |
| <i>Cortinarius talimultiformis</i> Kytöv., Liimat., Niskanen, A.F.S.<br>Taylor & Seshi 2014 | [79]     | yes |
| <i>Cortinarius talus</i> Fr. 1838                                                           | [79]     | no  |
| <i>Cortinarius torvus</i> (Fr.) Fr. 1838                                                    | [117]    | yes |
| <i>Cortinarius traganus</i> (Fr.) Fr. 1838                                                  | [117]    | yes |
| <i>Cortinarius trivialis</i> J.E. Lange 1940                                                | [121]    | yes |
| <i>Cortinarius tubarius</i> Ammirati & A.H. Sm. 1972                                        | [79]     | no  |
| <i>Cortinarius turbinatus</i> (Bull.) Fr. 1838                                              | [117]    | no  |
| <i>Cortinarius turgidus</i> Fr. 1838                                                        | [79]     | yes |
| <i>Cortinarius turmalis</i> Fr. 1838                                                        | [117]    | yes |
| <i>Cortinarius variicolor</i> (Pers.) Fr. 1838                                              | [117]    | yes |
| <i>Cortinarius varius</i> (Schaeff.) Fr. 1838                                               | [117]    | yes |
| <i>Cortinarius venetus</i> (Fr.) Fr. 1838                                                   | [117]    | yes |
| <i>Cortinarius vibratilis</i> (Fr.) Fr. 1838                                                | [117]    | no  |
| <i>Cortinarius violaceus</i> (L.) Gray 1821                                                 | [117]    | yes |
| <i>Cortinarius vulpinus</i> (Velen.) Rob. Henry 1947                                        | [79]     | no  |
| <i>Cortinarius xanthochlorus</i> Rob. Henry 1966                                            | [79]     | yes |
